RUNNING HEAD: Cerebellar-Basal Ganglia Connectivity

**From Synchrony to Asynchrony: Cerebellar-Basal Ganglia Functional Circuits in Young and Older Adults**

Hanna K. Hausman<sup>1#</sup>, T. Bryan Jackson<sup>1#</sup>, James R.M. Goen<sup>1</sup>, & Jessica A. Bernard<sup>1,2\*</sup>

<sup>1</sup>Department of Psychological and Brain Sciences  
Texas A&M University

<sup>2</sup>Texas A&M Institute for Neuroscience  
Texas A&M University

#Denotes shared first-authorship. These authors contributed equally to this work

\*Corresponding Author:

Jessica A. Bernard

515 Coke Street

4235 TAMU

College Station, TX 77843-4235

Email: [Jessica.bernard@tamu.edu](mailto:Jessica.bernard@tamu.edu)

Phone: 979-845-2581

Fax: 979-845-4727

## Abstract

Resting state functional magnetic resonance imaging (rs-fMRI) has indicated disruptions in functional connectivity in older (OA) relative to young adults (YA). While age differences in cortical networks are well studied, differences in subcortical networks are poorly understood. Both the cerebellum and the basal ganglia are of particular interest given their role in cognitive and motor functions, and work in non-human primates has demonstrated direct reciprocal connections between these regions. Here, our goal was twofold. First, we were interested in delineating connectivity patterns between distinct regions of the cerebellum and basal ganglia, known to have topologically distinct connectivity patterns with cortex. Our second goal was to quantify age-differences in these cerebellar-striatal circuits. We performed a targeted rs-fMRI analysis of the cerebellum and basal ganglia in 30 YA and 30 OA individuals. In the YA, we found significant connectivity both within and between the cerebellum and basal ganglia, in patterns supporting semi-discrete circuits that may differentially subserve motor and cognitive performance. We found a shift in connectivity, from one of synchrony in YA, to asynchrony in OA, resulting in substantial age differences. Connectivity was also associated with behavior. These findings significantly advance our understanding of cerebellar-basal ganglia interactions in the human brain.

**Keywords:** aging, basal ganglia, cerebellum, networks, resting state connectivity

## Introduction

Even in healthy aging, older adults (OA) experience declines in motor and cognitive functions (e.g., Salthouse 1996; Reuter-Lorenz et al. 1999; Park et al. 2001; Woollacott and Shumway-cook 2002; Heuninckx et al. 2005; Seidler et al. 2010; Anguera et al. 2011). Concurrent with these performance declines are changes in both brain structure (e.g., Raz et al. 1998, 2005, 2013; Salat et al. 2005; Walhovd et al. 2011; Bernard and Seidler 2013) and functional activation patterns (Reuter-Lorenz et al. 1999; Cabeza 2002; Davis et al. 2008; Seidler et al. 2010). While functional MRI (fMRI) has provided critical insights into the aging mind and brain, the fMRI testing environment itself may negatively affect performance due to scanner noises and participant stress responses to a novel environment (Hommel et al. 2012; Koten et al. 2013; van Maanen et al. 2016). This may exacerbate age effects in performance. Resting state fMRI (rs-fMRI) provides an alternative approach and allows for the examination of fluctuations in brain activity at rest (e.g., Biswal et al. 1995, 2010). In the absence of a task, brain regions that typically activate together during task performance show strong correlations with one another. Importantly, this methodology has delineated subcortical connectivity networks of the cerebellum (Habas et al. 2009; Krienen and Buckner 2009; O'Reilly et al. 2010; Bernard et al. 2012, 2014) and basal ganglia (Di Martino et al. 2008).

rs-fMRI is particularly useful for the study of aging and clinical populations. As noted above, this methodology removes the confounds of task performance in the scanner, and the scan times are on average, relatively short (from 5 to 15 minutes). Across a now fairly extensive literature on rs-fMRI in OA, typically, there are decreases across the board in network connectivity in older adults relative to younger adults (e.g., Andrews-Hanna et al. 2007; Damoiseaux et al. 2008; Langan et al. 2010; Bernard et al. 2013; Bo et al. 2014). Notably, these age differences in functional connectivity are also related to behavioral performance (both motor and cognitive) in OA (e.g., Andrews-Hanna et al. 2007; Langan et al. 2010; Bernard et al. 2013), supporting the functional relevance of these differences. Most of the rs-fMRI studies to date have investigated the connectivity patterns of the default mode network due to its implications in Alzheimer's disease (Ferreira and Busatto 2013). Subcortical network differences are relatively understudied, with few exceptions (Bernard et al. 2013; Bo et al. 2014).

The cerebellum is an important, but understudied, region in aging research. The cerebellum plays a role in both motor and cognitive behavior (e.g., Schmahmann and Sherman 1998; Desmond et al. 2005; Stoodley and Schmahmann 2009; E et al. 2012; Ferrucci et al. 2013). It is both smaller in volume (MacLulich et al. 2004; Raz et al. 2005a, 2013; Bernard and Seidler 2013; Miller et al. 2013) and has decreased functional connectivity in OA (Bernard et al.,

2013), negatively affecting performance in motor and cognitive tasks (e.g., Bernard et al., 2013; Bernard & Seidler, 2013). Similarly, the basal ganglia contribute to diverse functional domains (reviewed in Bernard et al. 2017) and have connectivity patterns with the cortex that likely underlies these behavioral contributions (Di Martino et al. 2008; Draganski et al. 2008). Functional networks of the basal ganglia are also known to be different across the lifespan (Bo et al. 2014). Notably, however, there are also bi-directional direct connections between the cerebellum and the basal ganglia (Hoshi et al. 2005; Bostan and Strick 2010, 2018, Bostan et al. 2010, 2013). More recently, using tractography, connections between the cerebellum and basal ganglia have been mapped *in vivo* in the human brain as well (Pelzer et al. 2013; Milardi et al. 2016). These connections include direct disynaptic connections between the cerebellum and subthalamic nucleus (Bostan et al., 2010; Hoshi et al., 2005), but also connections through the thalamus (Milardi et al., 2016; Bostan & Strick, 2018). The direct connections and resulting communication between these regions is of great interest. Though the nature of the shared communication and functional role of these connections is only speculative at this point, there is a general consensus within the field that a systems-level approach to investigating these structures and interactions is of great importance, and that these interactions are of both behavioral and clinical significance (Caligiore et al. 2017).

Here, our goals were two-fold. First, we were interested in carefully characterizing patterns of rs-fMRI connectivity between the cerebellum and basal ganglia. Prior work from our own group and others has suggested that resting signal in the cerebellum and basal ganglia is significantly correlated (Di Martino et al. 2008; Habas et al. 2009; Bernard et al. 2012). However, to our knowledge, there has been no detailed investigation to date quantifying the connectivity patterns between lobules of the cerebellum and sub-regions of the basal ganglia. Here, we used the striatal seeds defined by DiMartino and colleagues (2008), along with spherical seeds placed in the cerebellar lobules, localized using the SUIT atlas (Diedrichsen 2006; Diedrichsen et al. 2009). We focused on Lobules V and VI, as well as Crus I and II, as these regions are associated with primary motor, motor preparatory, frontal, and parietal regions of the cortex (Kelly and Strick 2003; Krienen and Buckner 2009; Strick et al. 2009; Bernard et al. 2012) and have networks that are overlapping with those of the striatum (Di Martino et al. 2008). This approach allowed us to test the hypothesis that lobules of the cerebellum and subregions of the basal ganglia that are associated with similar cortical regions based on functional topography, resting state connectivity, and diffusion tensor imaging work (Di Martino et al. 2008; Draganski et al. 2008; Habas et al. 2009; Krienen and Buckner 2009; Stoodley and Schmahmann 2009; Bernard et al. 2012; Bernard, Russell, et al. 2017; Stoodley et al. 2012)

would show significant connectivity at rest. That is, regions of the cerebellum associated with motor networks and function would be correlated with regions of the basal ganglia that are thought to be similarly engaged.

Second, we sought to characterize age differences in these patterns of connectivity between the cerebellum and basal ganglia. Given that both structures contribute to the performance of motor and cognitive tasks (e.g., Imamizu et al. 2000; Doyon et al. 2002; Chen and Desmond 2005; Stoodley and Schmahmann 2009; Bernard et al. 2017), domains which show marked performance differences in older adults (e.g., Park et al. 2001; Seidler et al. 2010; Bernard et al. 2013), an understanding of differences in the interactions between these regions may provide important new insights into age-related performance declines. Indeed, our prior work has suggested that there is decreased connectivity between the cerebellum and basal ganglia, and that connectivity between these regions contributes to performance in older adults (Bernard et al. 2013). A detailed analysis of age differences in connectivity provides an important foundation for future work investigating these associations with respect to behavior and for investigations of disease impacting the basal ganglia and cerebellum, particularly Parkinson's Disease (e.g., Wu and Hallett 2013; Bostan and Strick 2018). This also stands to provide important new insights into subcortical differences in OA, which are relatively understudied. We predicted that older adults would show lower connectivity between the regions and in connections that stand to impact both motor and cognitive behavior.

## Method

### Participants

We recruited 30 YA (age  $\pm$  stdev;  $22.33 \pm 2.82$  years, 12 females) and 30 OA (age  $\pm$  stdev;  $73.25 \pm 5.24$ , 16 females) from the greater College Station community with fliers and emails. All participants are healthy individuals with no history of neurological disorders or stroke and had no contraindications for fMRI scanning. In each age group, two participants were left handed. This was due to the initial inclusion of left-handed OA. Two left-handed YA participants were then recruited for matching purposes. Notably, the proportion of left-handed individuals (6.66%) is just below what is typically seen in the population at large (approximately 10%) (Oldfield 1971), making our investigation more broadly generalizable. Prior to beginning all study procedures, participants signed a consent form approved by Texas A&M University Institutional Review Board. In addition, all participants completed the Montreal Cognitive Assessment (MOCA) (Nasreddine et al. 2005), as well as the Activities-Specific Balance Confidence (ABC) Scale (Powell and Myers 1995).

### **rs-fMRI Acquisition**

Rs-fMRI data were collected using a 3-tesla Siemens Verio scanner with a 12-channel head coil at the Texas A&M Institute for Preclinical Studies. A 7 minute and 18 second blood-oxygen-level dependent (BOLD) scan was acquired with an echo-planar functional protocol (number of volumes =165, repetition time [TR]=2620 ms, echo time [TE]= 29 ms; flip angle [FA]=75°, 3.8x3.8x3.5 mm<sup>3</sup> voxels; 33 slices, FOV= 240 mm). In addition, a high-resolution T1-weighted 3D magnetization prepared rapid gradient multi-echo sequences (MPRAGE; sagittal plane; TR=1900 ms; TE=2.99 ms; 0.9 mm<sup>3</sup> isomorphic voxels; 160 slices; FOV=230 mm; FA=9°; time=5:59 minutes) to facilitate normalization of the rs-fMRI data.

### **rs-fMRI Preprocessing and Analysis**

All rs-fMRI analyses were completed using Conn toolbox version 17f (Whitfield-Gabrieli and Nieto Castañón 2012). This included preprocessing procedures that were implemented in Conn using SPM. We followed a standard preprocessing pipeline which included functional realignment and unwarping, functional centering of the image to (0, 0, 0) coordinates, slice-timing correction, structural centering to (0, 0, 0,) coordinates, structural segmentation and normalization to MNI space, functional normalization to MNI space, and spatial smoothing with a smoothing kernel of 6mm FWHM, paralleling recent work from our group (Bernard, Goen, et al. 2017). Because of the potential confounding effects of motion and signal outliers (Power et al. 2012; Van Dijk et al. 2012) these procedures also included processing using the Artifact Rejection Toolbox (ART). This was set using the 97<sup>th</sup> percentile settings and allowed for the quantification of participant motion in the scanner and the identification of outliers based on the mean signal. With these settings, the global-signal z-value threshold was set at 9mm, while the subject-motion threshold was set at 2 mm. Motion information and frame-wise outliers were included as covariates in our subsequent first-level analyses.

Rs-fMRI analysis focused on regions of interest (ROIs) in both the basal ganglia and cerebellum. The basal ganglia seed regions were based on those used by Di Martino and colleagues (2008) in their comprehensive mapping of striatal resting state connectivity, while cerebellar seeds were placed in the center of lobules V, VI, Crus I and Crus II as defined by the SUIT atlas (Diedrichsen, 2006; Diedrichsen et al., 2009). For all ROIs we created spherical seeds with a radius of 3.5mm. To limit multiple comparisons, we investigated cerebellar seeds in the right hemisphere, and striatal seeds in the left hemisphere. Coordinates for the basal ganglia and the cerebellar seeds can be found in Table 1.

[Table 1 about here]

Lastly, we completed ROI-ROI bivariate correlation analysis, to quantify the associations between subregions of the cerebellum and basal ganglia at rest. We investigated within-group connectivity patterns of our seeds of interest, and we compared connectivity of the YA and OA groups in these regions. Correlation analyses were conducted directly in the Conn Toolbox using the Fisher transformed connectivity values (z scores). Results were evaluated using an analysis level FDR correction such that  $p < .05$ . This correction takes into account the total number of pair-wise correlations run in our ROI-ROI analysis, and computes an FDR correction accordingly. Further, for all analyses we implemented permutation testing. We also used CONN to investigate correlations between ROI-ROI connectivity strength and behavioral performance, to begin to quantify and understand the behavioral relevance of these networks. We looked at associations between connectivity and MOCA scores, a measure of cognitive ability, and with ABC scores, a self-report measure balance confidence.

## Results

### Cerebellar-Basal Ganglia Connectivity Patterns

First, we analyzed patterns of connectivity within each age group. In YA only, there were patterns of connectivity both within the cerebellar and basal ganglia seeds, but also between regions in a manner that is segregated based on functional topography (see Table 2; Figure 1a). Looking at connections between the cerebellum and basal ganglia, areas of the cerebellum involved in cognitive processing (Crus I and II) are correlated with regions in the basal ganglia (VSs and DC) that are functionally coupled with cognitive cortical regions (Di Martino et al., 2008) and are active during cognitive processing (Bernard et al., 2017). Similarly, areas associated with motor function in the cerebellum (Lobules V and VI) are correlated with areas predominantly connected to motor cortical regions in the putamen (VRP, DRP, DCP).

[Table 2 about here]

[Figure 1 about here]

### Age Differences in Cerebellar-Basal Ganglia Connectivity

A within-group analysis suggested that much like YA, OA show within cerebellum and within basal ganglia connectivity, as well as patterns of connectivity between subregions of these subcortical brain regions (Table 3; Figure 1b). Notably, while in YA we see positive

correlations between the cerebellum and basal ganglia, the opposite is the case in OA. Patterns indicating significant *asynchrony* between these subcortical regions are present.

Also of interest are the differences as compared to YA. Our analyses demonstrated greater connectivity in YA relative to OA between the DRP and lobules V and VI. Lobules V and VI are strongly correlated with one another and implicated in motor networks (Kelly and Strick 2003; Krienen and Buckner 2009; Bernard et al. 2012). Given that the DRP is correlated with sensorimotor areas of the cortex (Di Martino et al., 2008), this demonstrates a decrease in communication between sub-cortical regions associated with motor processing networks. Indeed, while in YA we see strong correlations, in OA there are anticorrelations. There was also greater connectivity in YA relative to OA between the VSs and Crus I and Crus II, as well as between the DC and Crus I and Crus II. These regions of the basal ganglia and the cerebellum respectively are associated with cognitive networks and processing (Di Martino et al. 2008; Bernard et al. 2012; Stoodley et al. 2012; Bernard, Russell, et al. 2017). Interestingly, there is significantly higher connectivity between subregions within the basal ganglia in YA relative to OA; however, interactions within the cerebellum did not significantly differ between the two age groups. Overall, there is increased connectivity in YA relative to OA within basal ganglia subregions as well as between basal ganglia and cerebellar areas involved in motor and cognitive functioning. This is likely driven in large part by the flip from synchrony to asynchrony in YA and OA. Table 4 provides the statistical information from this analysis, and the results are visualized in Figure 2.

[Tables 3 and 4 about here]

[Figure 2 about here]

Finally, to investigate the behavioral relevance of these subcortical functional interactions, we investigated the associations between striatal-cerebellar connectivity and cognitive function, as measured using the MOCA, and balance confidence as measured using the ABC Scale. For our subsequent connectivity analyses, 1 OA and 1 YA were excluded. The OA scored low on the MOCA, and while they were included in our connectivity analyses, they are not representative of the rest of our sample, and had the potential to skew our findings. The YA participant did not properly complete the ABC scale, giving responses of 0, which would indicate that they are not confident at all in their balance. Comparisons below represent those with  $n=29$  per age group. Not surprisingly, scores on the MOCA differed between YA and OA (YA=  $27.55 \pm 1.72$ ; OA= $26.03 \pm 2.45$ ;  $t(57)=2.74$ ,  $p=.008$ ). Due to the relatively limited range



within each age group, we conducted these analyses with both age groups combined. Using a regression analysis implemented in CONN, we found that connectivity between Crus I and VSs was associated with MOCA score ( $t_{(58)}=3.53$ ,  $p_{FDR}=.019$ ,  $\beta=0.98$ ), suggesting that functional interactions between subcortical regions associated with cognitive cortical areas relate to general cognitive ability.

With respect to the ABC Scale, there were no significant age differences in self-reported balance confidence (YA=96.02  $\pm$  5.74; OA=93.28  $\pm$  12.83;  $t_{(58)}=1.05$ ,  $p=.296$ ), consistent with our prior work using this scale in healthy older adults (Bernard & Seidler, 2013), though numerically balance confidence is rated lower in OA. In OA alone, connectivity between Crus I and VSs was significantly positively associated with self-reported balance confidence ( $t_{(28)}=3.03$ ,  $p_{FDR}=.047$ ,  $\beta=.01$ ). This finding is consistent with our prior work looking at cerebellar network connectivity more broadly with respect to balance confidence in OA (Bernard et al. 2013).

## Discussion

Here, using an ROI-ROI based rs-fMRI analysis approach, we provide the first detailed mapping of striatal-cerebellar connectivity at rest in healthy humans supporting the notion of topographic organization of connectivity between these regions (Bostan and Strick 2018), and we have further demonstrated that there are age differences in these connectivity patterns. Broadly, connectivity in OA is decreased relative to that in YA, both within the striatum, and critically, between the cerebellum and striatum. Behaviorally, though data in this sample is limited, our results suggest that at least in terms of general cognitive function, there is an association with connectivity between the lateral posterior cerebellum (Crus I) and striatum (VSs). Taken together, these findings substantially broaden our understanding of the interactions between these two critical subcortical brain regions, both in healthy adulthood and in aging. Further, this is consistent with recent work suggesting that the basal ganglia and cerebellum form an integrated network with the cortex (Bostan and Strick 2018). This work has implications for our understanding of the role of striatal-cerebellar interactions from a processing perspective (i.e., what information is shared between these regions, how do they act together to produce behavior), in motor and cognitive declines in advanced age, and for age-related neurological disease, in particular Parkinson's Disease.

### *Cerebellar-Basal Ganglia Functional Connectivity Patterns*

Work in non-human primates has demonstrated that the basal ganglia and cerebellum interact through disynaptic connections (Hoshi et al. 2005; Bostan and Strick 2010, 2018, Bostan et al. 2010, 2013). More recent work using diffusion tensor imaging has demonstrated parallel connections in the human brain as well (Pelzer et al. 2013; Milardi et al. 2016). While

there have been suggestions in the broader rs-fMRI literature to indicate that there is functional coupling between the cerebellum and basal ganglia at rest (Di Martino et al. 2008; Bernard et al. 2012), a detailed investigation of the connections between individual lobules of the cerebellum and subregions of both the caudate and putamen had not been undertaken. Our results demonstrate that in healthy adults there is robust connectivity between ROIs in the cerebellum and basal ganglia and in patterns that are segregated based on similarity in functional connectivity patterns. For example, the dorsal caudate shows significant associations with both Crus I and II, but not lobules V and VI, while the dorsal and ventral rostral putamen seeds are strongly associated with Lobules V and VI, but not with Crus I and II. This parallels the relative functional segregation and topography of their cortical connectivity patterns with prefrontal and association cortices (dorsal caudate, Crus I, Crus II), and motor cortical regions (dorsal and ventral rostral putamen, Lobules V and VI) (Di Martino et al. 2008; Krienen and Buckner 2009; Bernard et al. 2012). This reciprocal communication between the regions indicates that the cerebellum and striatum are not just part of independent networks, but also exchange and integrate information with one another. Interestingly, in a recent comprehensive review of basal ganglia and cerebellar connectivity, Bostan and Strick (2018) suggest that the associations between these structures may underlie key cortical resting state networks. The segregated patterns of connectivity seen here in these pairwise analyses further support this notion.

#### *Age Differences in Cerebello-Striatal Connectivity*

To this point, the primary focus with respect to the literature on the aging mind and brain has taken a cortical focus. While inroads have been made in our understanding of differences in subcortical network connectivity patterns (Bernard et al. 2013; Bo et al. 2014), the associations between the cerebellum and basal ganglia may be of particular importance. Both of these regions play a role in motor and cognitive behavioral performance (Stoodley and Schmahmann 2009; E et al. 2012; Stoodley et al. 2012; Bernard et al. 2013; Bernard, Russell, et al. 2017) and have distinct networks and connections with both prefrontal and association cortices, and motor cortical regions (Kelly and Strick 2003; Di Martino et al. 2008; Draganski et al. 2008; Habas et al. 2009; Krienen and Buckner 2009; O'Reilly et al. 2010; Salmi et al. 2010; Bernard et al. 2012, 2014, 2016). Critically, both motor and cognitive performance are subject to age-related performance declines, and a more complete understanding of brain regions and their networks that contribute to these domains is necessary for understanding these changes. As such, both the cerebellum and basal ganglia are of great interest. In OA, there is evidence to suggest that there are differences in cerebellar volume and connectivity, both of which relate to behavioral performance (MacLulich et al. 2004; Raz et al. 2005b; Bernard and Seidler 2013; Bernard et al.

2013; Miller et al. 2013; Raz and Lindenberger 2013), and there are also known differences in basal ganglia functional connectivity across the lifespan, with declines in advanced age (Bo et al. 2014). While our work has suggested that there are functionally relevant age differences in connectivity between the cerebellum and basal ganglia (Bernard et al. 2013), a detailed investigation of age differences in these connectivity patterns has not been undertaken to this point.

Here, we found that there are age differences in this circuit, broadly. Each cerebellar seed investigated showed significantly lower connectivity with striatal seeds. And while within region connectivity was not the primary focus of our investigation, there was markedly lower connectivity within the striatum in OA. Also of note is that within the OA alone, connectivity between the cerebellum and striatum was in the negative direction, opposite what was found in YA alone. Not only are the patterns of subcortical coupling significant different in YA and OA, they are divergent in terms of the direction of the associations. In YA there is strong coupling and synchrony between the cerebellum and basal ganglia, whereas in OA we see significant asynchrony suggesting an age-related shift in the interactions between these key subcortical regions. As noted above, Bostan & Strick (2018) have suggested that these interactions may be critical for broader resting state functional networks. Such a shift in the direction of the associations with age may have wide ranging impacts on functional connectivity more broadly in advanced age and may contribute to the age differences seen in the canonical cortical resting state networks (Andrews-Hanna et al. 2007; Wu et al. 2007; Damoiseaux et al. 2008; Onoda et al. 2012; He et al. 2014).

The shift in directionality with respect to cerebello-striatal connections is of great interest, particularly when considering underlying mechanisms and implications of these changes for our understanding of disease, particularly Parkinson's disease. As suggested in our prior work which demonstrated age differences in cerebellar connectivity, including that with the basal ganglia which laid the foundation for our study here (Bernard et al. 2013), dopamine may be especially important. Even in healthy aging, there is a normative decrease in dopamine (McGeer et al. 1977; Fearnley and Lees 1991), and this change in dopamine may impact the functional interactions between these key subcortical regions. Further, in a study of healthy young adults, when administered l-dopa there is a significant increase in the connectivity between the cerebellum and basal ganglia, particularly in motor networks (Kelly et al. 2009). Notably, however, here we show this age-related asynchrony across connections. Thus, we speculate that during adulthood as dopamine naturally begins to decline, the nature of the interactions between the cerebellum and basal ganglia shifts from one of synchrony to that of

asynchrony. When considering the implications of this finding for Parkinson's disease, we suggest a "U-shaped" pattern of connectivity. That is, connectivity is high in healthy YA, decreased and shifted in direction in healthy OA, and in Parkinson's shifts to hyperconnectivity when off dopaminergic medication (e.g., Kwak et al. 2010; Festini et al. 2015). This hyperconnectivity shifts back more to normal patterns of connectivity when on medication (Kwak et al. 2010; Festini et al. 2015). An acknowledgement of this baseline type and degree of interaction in OA is important for our understanding of broader network connectivity, as well as the behavioral implications of these age differences.

In addition to our mapping of the resting state connectivity patterns between the cerebellum and striatum, we also investigated the behavioral relevance of these contributions. While our behavioral battery was limited, we demonstrated that connectivity between Crus I and the superior ventral striatum was positively associated with the MOCA. This parallels the functional specificity of the cerebello-striatal connections, as well as the functional topographies of these regions (Stoodley and Schmahmann 2009; E et al. 2012; Stoodley et al. 2012; Bernard, Russell, et al. 2017). Further, consistent with our prior work looking at cerebello-cortical connectivity in OA (Bernard et al. 2013), we found an association between self-reported balance confidence and connectivity again between Crus I and VSs. Our past work implicated Crus II and the caudate broadly (Bernard et al. 2013), and our replication here further underscores the importance of this circuit with respect to postural control. It is notable that these regions are associated more typically with cognition. However, there is a known increased reliance in cognitive function and circuits for postural control in OA (e.g., Verghese et al. 2002; Huxhold et al. 2006). Broadly, these findings provide support for the functional behavioral relevance of these connections, though future work with more extensive behavioral batteries is warranted. Further, it is important to note that the functional and computational roles of these regions in processing remains only theoretical to this point, with respect to the interactions between these structures (reviewed in Bostan & Strick 2018).

#### *Limitations and Future Directions*

While our results greatly advance our understanding of the functional interactions between the cerebellum and basal ganglia in the human brain in YA and OA, there are also several limitations to this work. First, the behavioral testing battery was rather limited in our sample. While participants completed general questionnaire measures and the MOCA, they did not complete an extensive cognitive or motor task battery. As such, we are limited in our ability to investigate the behavioral implications of cerebellar-basal ganglia functional connectivity, and how this may relate to age differences in performance. While we demonstrated an association

with MOCA scores in task-relevant regions, future work is needed to better understand the implications of these networks in both the motor and cognitive domain. Indeed, such work stands to be greatly illuminating for our understanding of behavioral differences in OA, as far less focus has been paid to subcortical regions and their networks.

In addition, we focused only the caudate and putamen, using striatal sub-regions previously defined by Di Martino and colleagues (2008), though the animal work initially describing these connections implicated the globus pallidus *pars externa*, the subthalamic nucleus, and the cerebellar dentate (Hoshi et al. 2005; Bostan et al. 2010). However, we were concerned about possible challenges with the resolution of our rs-fMRI data, and we aimed for consistency in the size of our seeds. While it is possible to reliably measure connectivity from single-voxel seeds as we have done previously with the dentate nucleus (Bernard et al. 2014), we wanted to use seeds of the same size in our investigation here, and collect whole-brain data. The 3.5mm radius employed here, modelled after Di Martino and colleagues (2008) would be too large to investigate the subthalamic nucleus or dentate without encompassing surrounding regions. Thus, we are limited with respect to our conclusions regarding functional interactions between the cerebellum and basal ganglia more broadly, as these smaller areas of the basal ganglia have not been included in our analyses. Future work with high resolution imaging, perhaps that which uses a limited number of high resolution slices, is needed to look at these smaller regions more effectively.

On a similar note, we also limited out cerebellar seeds to only lobules V, VI, Crus I and Crus II. These regions show patterns of connectivity with primary motor, motor preparatory networks, and frontal-parietal cortical regions (e.g., Bernard et al, 2012; Krienen & Buckner 2009), many of which overlap with striatal-cortical resting state networks (Di Martino et al. 2008). While a comprehensive overview including all the lobules of the cerebellar hemispheres and vermis may be informative, it also creates issues with multiple comparisons (18 cerebellar regions, if only using one hemisphere and the vermis). We took a conservative statistical approach in our work here using an analysis-level correction at  $p_{FDR} < .05$ , which took into account the number of pairwise connections in our model. While such a correction could be implemented in this analysis, we would be relatively underpowered given our sample size and the total number of seeds. As such, we focused on regions of the cerebellum that we predicted would show coherence with the striatal seeds used here, with the caveat that other cerebellar lobules may also show functional connectivity with the striatum and may be impacted by aging.

**Acknowledgments.** The authors wish to thank all research participants for their time and effort taking part in this investigation. JAB was supported, in part, by the Brain and Behavior Research Foundation NARSAD Young Investigator Award as the Donald and Janet Boardman Family Investigator while this project was ongoing.

## References

- Andrews-Hanna JR, Snyder AZ, Vincent JL, Lustig C, Head D, Raichle ME, Buckner RL. 2007. Disruption of large-scale brain systems in advanced aging. *Neuron*. 56:924–935.
- Anguera JA, Reuter-Lorenz PA, Willingham DT, Seidler RD. 2011. Failure to Engage Spatial Working Memory Contributes to Age-related Declines in Visuomotor Learning. *J Cogn Neurosci*. 23:11–25.
- Bernard JA, Peltier SJ, Wiggins JL, Jaeggi SM, Buschkuhl M, Fling BW, Kwak Y, Jonides J, Monk CS, Seidler RD. 2013. Disrupted cortico-cerebellar connectivity in older adults. *Neuroimage*.
- Bernard JA, Goen JRM, Maldonado T. 2017. A case for motor network contributions to schizophrenia symptoms: Evidence from resting-state connectivity. *Hum Brain Mapp*. 38:4535–4545.
- Bernard JA, Orr JM, Mittal VA. 2016. Differential motor and prefrontal cerebello-cortical network development: evidence from multimodal neuroimaging. *Neuroimage*. 124:291–601.
- Bernard JA, Peltier SJ, Benson BL, Wiggins JL, Jaeggi SM, Buschkuhl M, Jonides J, Monk CS, Seidler RD. 2014. Dissociable Functional Networks of the Human Dentate Nucleus. *Cereb Cortex*. 24:2151–2159.
- Bernard JA, Russell CE, Newberry RE, Goen JRM, Mittal VA. 2017. Patients with schizophrenia show aberrant patterns of basal ganglia activation: Evidence from ALE meta-analysis. *NeuroImage Clin*. 14:450–463.
- Bernard JA, Seidler RD. 2013. Relationships Between Regional Cerebellar Volume and Sensorimotor and Cognitive Function in Young and Older Adults. *Cerebellum*.
- Bernard JA, Seidler RD, Hassevoort KM, Benson BL, Welsh RC, Wiggins JL, Jaeggi SM, Buschkuhl M, Monk CS, Jonides J, Peltier SJ. 2012. Resting state cortico-cerebellar functional connectivity networks: a comparison of anatomical and self-organizing map approaches. *Front Neuroanat*. 6:31.
- Biswal B, Yetkin FZ, Haughton VM, Hyde JS. 1995. Functional Connectivity in the Motor Cortex of Resting. *Magn Reson Med*. 34:537–541.
- Biswal BB, Mennes M, Zuo X-N, Gohel S, Kelly C, Smith SM, Beckmann CF, Adelstein JS, Buckner RL, Colcombe S, Dogonowski A-M, Ernst M, Fair D, Hampson M, Hoptman MJ, Hyde JS, Kiviniemi VJ, Kötter R, Li S-J, Lin C-P, Lowe MJ, Mackay C, Madden DJ, Madsen KH, Margulies DS, Mayberg HS, McMahon K, Monk CS, Mostofsky SH, Nagel BJ, Pekar JJ, Peltier SJ, Petersen SE, Riedl V, Rombouts S a RB, Rypma B, Schlaggar BL, Schmidt S, Seidler RD, Siegle GJ, Sorg C, Teng G-J, Veijola J, Villringer A, Walter M, Wang L,

- Weng X-C, Whitfield-Gabrieli S, Williamson P, Windischberger C, Zang Y-F, Zhang H-Y, Castellanos FX, Milham MP. 2010. Toward discovery science of human brain function. *Proc Natl Acad Sci U S A*. 107:4734–4739.
- Bo J, Lee C-M, Kwak Y, Peltier SJ, Bernard J a, Buschkuehl M, Jaeggi SM, Wiggins JL, Jonides J, Monk CS, Seidler RD. 2014. Lifespan differences in cortico-striatal resting state connectivity. *Brain Connect*. 4:166–180.
- Bostan AC, Dum RP, Strick PL. 2010. The basal ganglia communicate with the cerebellum. *Proc Natl Acad Sci U S A*. 107:8452–8456.
- Bostan AC, Dum RP, Strick PL. 2013. Cerebellar networks with the cerebral cortex and basal ganglia. *Trends Cogn Sci*. 17:241–254.
- Bostan AC, Strick PL. 2010. The cerebellum and basal ganglia are interconnected. *Neuropsychol Rev*. 20:261–270.
- Bostan AC, Strick PL. 2018. The basal ganglia and the cerebellum: nodes in an integrated network. *Nat Rev Neurosci*.
- Cabeza R. 2002. Hemispheric asymmetry reduction in older adults: The HAROLD model. *Psychol Aging*. 17:85–100.
- Caligiore D, Pezzulo G, Baldassarre G, Bostan AC, Strick PL, Doya K, Helmich RC, Dirx M, Houk J, Jörntell H, Lago-Rodriguez A, Galea JM, Miall RC, Popa T, Kishore A, Verschure PFMJ, Zucca R, Herreros I. 2017. Consensus Paper: Towards a Systems-Level View of Cerebellar Function: the Interplay Between Cerebellum, Basal Ganglia, and Cortex. *Cerebellum*. 16:203–229.
- Chen SHA, Desmond JE. 2005. Cerebrocerebellar networks during articulatory rehearsal and verbal working memory tasks. *Neuroimage*. 24:332–338.
- Damoiseaux JS, Beckmann CF, Arigita EJS, Barkhof F, Scheltens P, Stam CJ, Smith SM, Rombouts S a RB. 2008. Reduced resting-state brain activity in the “default network” in normal aging. *Cereb Cortex*. 18:1856–1864.
- Davis SW, Dennis NA, Daselaar SM, Fleck MS, Cabeza R. 2008. Qué PASA? the posterior-anterior shift in aging. *Cereb Cortex*. 18:1201–1209.
- Desmond JE, Chen SHA, Shieh PB. 2005. Cerebellar transcranial magnetic stimulation impairs verbal working memory. *Ann Neurol*. 58:553–560.
- Di Martino A, Scheres A, Margulies DS, Kelly AMC, Uddin LQ, Shehzad Z, Biswal B, Walters JR, Castellanos FX, Milham MP. 2008. Functional connectivity of human striatum: a resting state fMRI study. *Cereb Cortex*. 18:2735–2747.
- Diedrichsen J. 2006. A spatially unbiased atlas template of the human cerebellum. *Neuroimage*.



33:127–138.

- Diedrichsen J, Balsters JH, Flavell J, Cussans E, Ramnani N. 2009. A probabilistic MR atlas of the human cerebellum. *Neuroimage*. 46:39–46.
- Doyon J, Song AW, Karni A, Lalonde F, Adams MM, Ungerleider LG. 2002. Experience-dependent changes in cerebellar contributions to motor sequence learning. *Proc Natl Acad Sci U S A*. 99:1017–1022.
- Draganski B, Kherif F, Klöppel S, Cook P a, Alexander DC, Parker GJM, Deichmann R, Ashburner J, Frackowiak RSJ. 2008. Evidence for segregated and integrative connectivity patterns in the human Basal Ganglia. *J Neurosci*. 28:7143–7152.
- E K-H, Chen S-HA, Ho M-HR, Desmond JE. 2012. A meta-analysis of cerebellar contributions to higher cognition from PET and fMRI studies. *Hum Brain Mapp*. 0.
- Fearnley JM, Lees AJ. 1991. Ageing and Parkinson's Disease: substantia nigra regional selectivity. *Brain*. 114:2283–2301.
- Ferreira LK, Busatto GF. 2013. Resting-state functional connectivity in normal brain aging. *Neurosci Biobehav Rev*. 37:384–400.
- Ferrucci R, Brunoni AR, Parazzini M, Vergari M, Rossi E, Fumagalli M, Mameli F, Rosa M, Giannicola G, Zago S, Priori A. 2013. Modulating human procedural learning by cerebellar transcranial direct current stimulation. *Cerebellum*. 12:485–492.
- Festini SB, Bernard JA, Kwak Y, Peltier S, Bohnen NI, Müller MLTM, Dayalu P, Seidler RD. 2015. Altered cerebellar connectivity in Parkinson's patients ON and OFF L-DOPA medication. *Front Hum Neurosci*. 9:1–13.
- Habas C, Kamdar N, Nguyen D, Prater K, Beckmann CF, Menon V, Greicius MD. 2009. Distinct cerebellar contributions to intrinsic connectivity networks. *J Neurosci*. 29:8586–8594.
- He X, Qin W, Liu Y, Zhang X, Duan Y, Song J, Li K, Jiang T, Yu C. 2014. Abnormal salience network in normal aging and in amnesic mild cognitive impairment and Alzheimer's disease. *Hum Brain Mapp*. 35:3446–3464.
- Heuninckx S, Wenderoth N, Debaere F, Peeters R, Swinnen SP. 2005. Neural basis of aging: the penetration of cognition into action control. *J Neurosci*. 25:6787–6796.
- Hommel B, Fischer R, Colzato LS, Van den Wildenberg WPM, Cellini C. 2012. The effect of fMRI (Noise) on cognitive control. *J Exp Psychol Hum Percept Perform*. 38:290–301.
- Hoshi E, Tremblay L, Féger J, Carras PL, Strick PL. 2005. The cerebellum communicates with the basal ganglia. *Nat Neurosci*. 8:1491–1493.
- Huxhold O, Li S-C, Schmiedek F, Lindenberger U. 2006. Dual-tasking postural control: aging and the effects of cognitive demand in conjunction with focus of attention. *Brain Res Bull*.

69:294–305.

Imamizu H, Miyauchi S, Tamada T, Sasaki Y, Takino R, Pütz B, Yoshioka T, Kawato M. 2000.

Human cerebellar activity reflecting an acquired internal model of a new tool. *Nature*. 403:192–195.

Kelly C, de Zubicaray G, Di Martino A, Copland DA, Reiss PT, Klein DF, Castellanos FX, Milham MP, McMahon K. 2009. L-dopa modulates functional connectivity in striatal cognitive and motor networks: a double-blind placebo-controlled study. *J Neurosci*. 29:7364–7378.

Kelly RM, Strick PL. 2003. Cerebellar Loops with Motor Cortex and Prefrontal Cortex of a Nonhuman Primate. *J Neurosci*. 23:8432–8444.

Koten JW, Langner R, Wood G, Willmes K. 2013. Are reaction times obtained during fMRI scanning reliable and valid measures of behavior? *Exp Brain Res*. 227:93–100.

Krienen FM, Buckner RL. 2009. Segregated fronto-cerebellar circuits revealed by intrinsic functional connectivity. *Cereb Cortex*. 19:2485–2497.

Kwak Y, Peltier S, Bohnen NI, Müller MLTM, Dayalu P, Seidler RD. 2010. Altered resting state cortico-striatal connectivity in mild to moderate stage Parkinson's disease. *Front Syst Neurosci*. 4:143.

Langan J, Peltier SJ, Bo J, Fling BW, Welsh RC, Seidler RD. 2010. Functional implications of age differences in motor system connectivity. *Front Syst Neurosci*. 4:17.

MacLulich AMJ, Edmond CL, Ferguson KJ, Wardlaw JM, Starr JM, Seckl JR, Deary IJ. 2004. Size of the neocerebellar vermis is associated with cognition in healthy elderly men. *Brain Cogn*. 56:344–348.

McGeer PL, McGeer EG, Suzuki JS. 1977. Aging and Extrapyrmidal Function. *Arch Neurol*. 34:33–35.

Milardi D, Arrigo A, Anastasi G, Cacciola A, Marino S, Mormina E, Calamuneri A, Bruschetta D, Cutroneo G, Trimarchi F, Quartarone A. 2016. Extensive Direct Subcortical Cerebellum-Basal Ganglia Connections in Human Brain as Revealed by Constrained Spherical Deconvolution Tractography. *Front Neuroanat*. 10:1–10.

Miller TD, Ferguson KJ, Reid LM, Wardlaw JM, Starr JM, Seckl JR, Deary IJ, MacLulich AMJ. 2013. Cerebellar vermis size and cognitive ability in community-dwelling elderly men. *Cerebellum*. 12:68–73.

Nasreddine Z, Phillips N, Bédirian V, Charbonneau S, Whitehead V, Collin I, Cummings J, Chertkow H. 2005. The Montreal Cognitive Assessment, MoCA: a brief screening tool for mild cognitive impairment. *J Am Geriatr Soc*. 53:695–699.

- O'Reilly JX, Beckmann CF, Tomassini V, Ramnani N, Johansen-Berg H. 2010. Distinct and overlapping functional zones in the cerebellum defined by resting state functional connectivity. *Cereb Cortex*. 20:953–965.
- Oldfield RC. 1971. The assessment and analysis of handedness: The Edinburgh inventory. *Neuropsychologia*. 9:97–113.
- Onoda K, Ishihara M, Yamaguchi S. 2012. Decreased Functional Connectivity by Aging Is Associated with Cognitive Decline. *J Cogn Neurosci*. 24:2186–2198.
- Park DC, Polk TA, Mikels JA, Taylor SF, Marshu. 2001. Cerebral aging: integration of brain and behavioral models of cognitive function. *Dialogues Clin Neurosci*. 3:151–165.
- Pelzer EA, Hintzen A, Goldau M, von Cramon DY, Timmermann L, Tittgemeyer M. 2013. Cerebellar networks with basal ganglia: feasibility for tracking cerebello-pallidal and subthalamo-cerebellar projections in the human brain. *Eur J Neurosci*. 38:3106–3114.
- Powell L, Myers A. 1995. The Activities-specific Balance Confidence (ABC) Scale. *J Gerontol Biol Sci Med Sci*. 50A:M28–M34.
- Power JD, Barnes K a, Snyder AZ, Schlaggar BL, Petersen SE. 2012. Spurious but systematic correlations in functional connectivity MRI networks arise from subject motion. *Neuroimage*. 59:2142–2154.
- Raz N, Dupuis JH, Briggs SD, McGavran C, Acker JD. 1998. Differential effects of age and sex on the cerebellar hemispheres and the vermis: a prospective MR study. *AJNR Am J Neuroradiol*. 19:65–71.
- Raz N, Lindenberger U. 2013. Life-span plasticity of the brain and cognition: from questions to evidence and back. *Neurosci Biobehav Rev*. 37:2195–2200.
- Raz N, Lindenberger U, Rodrigue KM, Kennedy KM, Head D, Williamson A, Dahle C, Gerstorff D, Acker JD. 2005. Regional brain changes in aging healthy adults: general trends, individual differences and modifiers. *Cereb Cortex*. 15:1676–1689.
- Raz N, Schmiedek F, Rodrigue KM, Kennedy KM, Lindenberger U, Lövdén M. 2013. Differential brain shrinkage over 6 months shows limited association with cognitive practice. *Brain Cogn*. 82:171–180.
- Reuter-Lorenz PA., Stanczak L, Miller a. C. 1999. Neural Recruitment and Cognitive Aging: Two Hemispheres Are Better Than One, Especially as You Age. *Psychol Sci*. 10:494–500.
- Salat DH, Tuch DS, Greve DN, van der Kouwe a JW, Hevelone ND, Zaleta a K, Rosen BR, Fischl B, Corkin S, Rosas HD, Dale a M. 2005. Age-related alterations in white matter microstructure measured by diffusion tensor imaging. *Neurobiol Aging*. 26:1215–1227.
- Salmi J, Pallesen K, Neuvonen T. 2010. Cognitive and motor loops of the human cerebro-

- cerebellar system. *J Cogn* .... 2663–2676.
- Salthouse TA. 1996. The processing-speed theory of adult age differences in cognition. *Psychol Rev*. 103:403–428.
- Schmahmann JD, Sherman JC. 1998. The cerebellar cognitive affective syndrome. *Brain*. 121:561–579.
- Seidler RD, Bernard JA, Burutolu TB, Fling BW, Gordon MT, Gwin JT, Kwak Y, Lipps DB. 2010. Motor control and aging: links to age-related brain structural, functional, and biochemical effects. *Neurosci Biobehav Rev*. 34:721–733.
- Stoodley CJ, Schmahmann JD. 2009. Functional topography in the human cerebellum: a meta-analysis of neuroimaging studies. *Neuroimage*. 44:489–501.
- Stoodley CJ, Valera EM, Schmahmann JD. 2012. Functional topography of the cerebellum for motor and cognitive tasks: an fMRI study. *Neuroimage*. 59:1560–1570.
- Strick PL, Dum RP, Fiez JA. 2009. Cerebellum and Nonmotor Function. *Annu Rev Neurosci*. 32:413–434.
- Van Dijk KRA, Sabuncu MR, Buckner RL. 2012. The influence of head motion on intrinsic functional connectivity MRI. *Neuroimage*. 59:431–438.
- van Maanen L, Forstmann BU, Keuken MC, Wagenmakers EJ, Heathcote A. 2016. The impact of MRI scanner environment on perceptual decision-making. *Behav Res Methods*. 48:184–200.
- Verghese J, Buschke H, Viola L, Katz M. 2002. Validity of Divided Attention Tasks In Predicting Falls in Older Individuals: A Preliminary Study. 1572–1576.
- Walhovd KB, Westlye LT, Amlie I, Espeseth T, Reinvang I, Raz N, Agartz I, Salat DH, Greve DN, Fischl B, Dale AM, Fjell AM. 2011. Consistent neuroanatomical age-related volume differences across multiple samples. *Neurobiol Aging*. 32:916–932.
- Whitfield-Gabrieli S, Nieto Castañón A. 2012. Conn: a functional connectivity toolbox for correlated and anticorrelated brain networks. *Brain Connect*. 2:125–141.
- Woollacott M, Shumway-cook A. 2002. Attention and the control of posture and gait: a review of an emerging area of research. 16:1–14.
- Wu T, Hallett M. 2013. The cerebellum in Parkinson's disease. *Brain*.
- Wu T, Zang Y, Wang L, Long X, Hallett M, Chen Y, Li K, Chan P. 2007. Aging influence on functional connectivity of the motor network in the resting state. *Neurosci Lett*. 422:164–168.

## Tables

**Table 1: Coordinates for Striatal and Cerebellar Regions of Interest**

| Seed Regions          | X   | Y   | Z   |
|-----------------------|-----|-----|-----|
| <b>Basal Ganglia:</b> |     |     |     |
| VSi                   | -9  | 9   | 8   |
| VSs                   | -10 | 15  | 0   |
| DC                    | -13 | 15  | 9   |
| DCP                   | -28 | 1   | 3   |
| DRP                   | -25 | 8   | 6   |
| VRP                   | -20 | 12  | -3  |
| <b>Cerebellum:</b>    |     |     |     |
| Lobule V              | 16  | -52 | -17 |
| Lobule VI             | 26  | -60 | -25 |
| Crus I                | 47  | -61 | -34 |
| Crus II               | 41  | -70 | -46 |

Notes: Coordinates for the left basal ganglia hemisphere and the right cerebellar hemisphere are reported in MNI stereotaxic space.

**Table 2:** Significance tests of beta for ROI-ROI connections in YA only. Only significant ROI-ROI relationships are presented here.

| Seed Regions             | beta | T (58) Value | p(FDR) |
|--------------------------|------|--------------|--------|
| R Crus I – R Lobule VI   | .7   | 23.56        | < .001 |
| R Crus I – R Crus II     | .93  | 20.60        | < .001 |
| R Crus I – R Lobule V    | .19  | 6.31         | <.001  |
| R Crus I – L VSs         | .1   | 3.21         | .007   |
| R Crus I – L VRP         | .09  | 3.08         | .009   |
| R Crus I – L DC          | .09  | 2.50         | .032   |
| R Crus II – R Lobule VI  | .24  | 7.27         | <.001  |
| R Crus II – L VSs        | .16  | 5.22         | <.001  |
| R Crus II – L DC         | .13  | 3.33         | .006   |
| R Crus II – L VRP        | .08  | 3.14         | .008   |
| R Lobule V – R Lobule VI | .88  | 21.74        | <.001  |
| R Lobule V – L DRP       | .09  | 3.18         | .008   |
| R Lobule V – L VRP       | .09  | 3.00         | .001   |
| R Lobule V – L DCP       | .07  | 2.42         | .037   |
| R Lobule VI – L VRP      | .11  | 23.56        | < .001 |
| R Lobule VI – L DRP      | .11  | 3.07         | .009   |

|                           |     |       |       |
|---------------------------|-----|-------|-------|
| L VRP – L DRP             | .38 | 12.37 | <.001 |
| L VRP – L DCP             | .21 | 7.63  | <.001 |
| L VRP – L VSs             | .24 | 6.68  | <.001 |
| L VRP – L DC              | .18 | 6.42  | <.001 |
| L VRP – L VS <sub>i</sub> | .11 | 3.45  | .005  |
| L DRP – L DCP             | .36 | 12.95 | <.001 |
| L DRP – VSs               | .12 | 4.08  | <.001 |
| L DRP – L DC              | .09 | 3.34  | .006  |
| L VSs – L DC              | .34 | 8.16  | <.001 |
| L VSs – L VS <sub>i</sub> | .27 | 7.64  | <.001 |
| L DC – VS <sub>i</sub>    | .12 | 4.72  | <.001 |

Notes: P values are FDR corrected with permutation testing.

**Table 3:** Significance tests of beta for ROI-ROI connections in OA only. Only significant ROI-ROI relationships are presented here.

| Seed Regions              | beta | T (58) Value | p(FDR) |
|---------------------------|------|--------------|--------|
| R Crus I – R Lobule VI    | .76  | 17.43        | < .001 |
| R Crus I – R Crus II      | .99  | 22.92        | < .001 |
| R Crus I – R Lobule V     | .28  | 7.63         | <.001  |
| R Crus I – L VSs          | -.1  | -3.27        | .008   |
| R Crus I – L DC           | -.11 | -2.81        | .002   |
| R Crus II – R Lobule VI   | .35  | 7.26         | <.001  |
| R Crus II – R Lobule V    | .15  | 4.01         | .002   |
| R Lobule V – R Lobule VI  | .95  | 23.10        | <.001  |
| R Lobule V – L DC         | -.1  | -2.83        | .002   |
| R Lobule V – L VSs        | -.07 | -2.59        | .031   |
| R Lobule VI – L DC        | -.13 | -4.10        | .002   |
| R Lobule VI – L VSs       | -.1  | -4.02        | .002   |
| L VRP – L DCP             | .13  | 3.87         | .002   |
| L VRP – L VS <sub>i</sub> | .14  | 3.78         | .002   |
| L VRP – L DRP             | .12  | 3.42         | .006   |
| L DRP – L DCP             | .18  | 6.46         | <.001  |



## Cerebellar-Basal Ganglia Connectivity

25

|               |     |       |       |
|---------------|-----|-------|-------|
| L DRP – L DC  | .12 | 3.88  | .002  |
| L DRP – L VSs | .07 | 2.87  | .002  |
| L DCP – L DC  | .06 | 2.83  | .008  |
| L VSs – L DC  | .45 | 10.98 | <.001 |
| L VSi – L VSs | .16 | 3.90  | .002  |
| L VSi – L DC  | .09 | 2.72  | .02   |

Notes: P values are FDR corrected with permutation testing.

**Table 4:** Significance tests of beta for regions in YA>OA contrasts. Only significant ROI-ROI relationships are presented here.

| Seed Regions           | beta | T (58) Value | p(FDR) |
|------------------------|------|--------------|--------|
| R Crus I – L VSs       | .21  | 4.58         | < .001 |
| R Crus I – L DC        | .20  | 3.75         | .003   |
| R Crus II – L VSs      | .25  | 5.00         | <.001  |
| R Crus II – L DC       | .17  | 2.95         | .021   |
| R Crus II – R Lobule V | -.13 | -2.87        | .006   |
| R Lobule V – L DRP     | .12  | 3.17         | .003   |
| R Lobule VI – L VSs    | .12  | 3.29         | .002   |
| R Lobule VI – L DRP    | .12  | 3.00         | .004   |
| L DCP – L DRP          | .17  | 4.38         | <.001  |
| L DRP – L VRP          | .26  | 5.53         | <.001  |
| L VRP – L VSs          | .16  | 3.28         | .011   |

Notes: P values are FDR corrected with permutation testing.

## Figure Captions

**Figure 1.** Significant ROI-ROI connections in young adults and **B.** in older adults. In both panels, the top left shows a three dimensional extraction of the subcortical surfaces with the cerebellum at the bottom, and the basal ganglia at the top and more anterior. This image is presented in radiological orientation such that the right hemisphere is on the right. The color of the connections is indicative of the direction of the associations (red: positive, blue: negative) though the color is absolute and provides no information regarding the degree of the associations. The bottom left presents a correlation matrix of the beta values, while the connectome ring on the bottom right provides an overview of the strength of the ROI-ROI connections within each age group.

**Figure 2.** Age differences in cerebello-striatal connectivity. Top panel: cerebellum and striatum shown in context with the cerebral cortex overlaid on top, and then extracted from the cortex with the cerebellum on the bottom and basal ganglia on top and more anterior. The color of the connections is indicative of the direction of the associations (red: positive, blue: negative). The bottom left provides an overview of the strength of the ROI-ROI connections significant demonstrating group differences in connectivity, while the bottom right presents a correlation matrix of the beta values with respect to the age differences. In all cases these data represent the contrast of young adults greater than older adults

# A. Young Adults

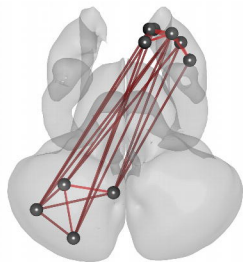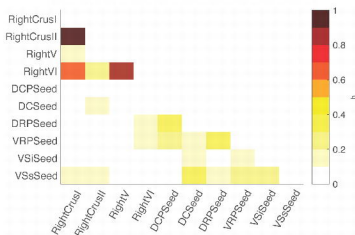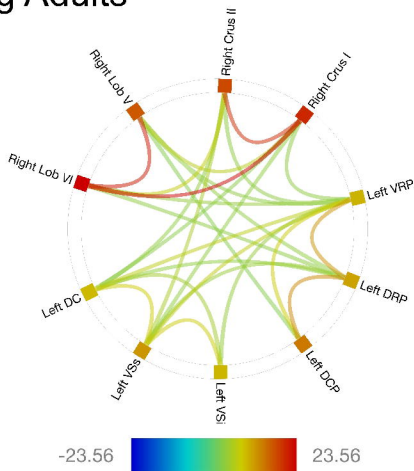

# B. Older Adults

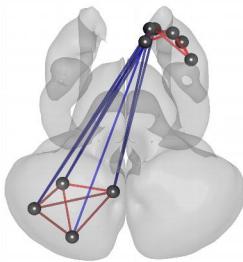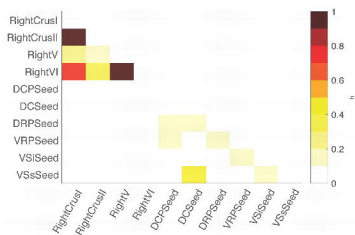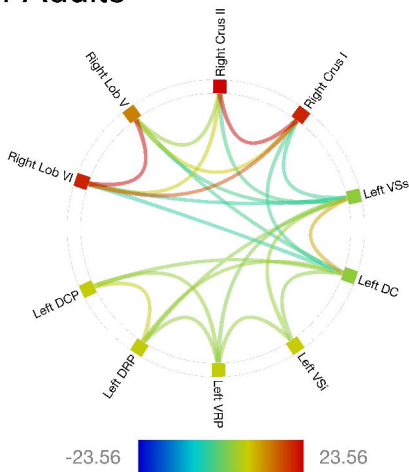

Source: http://biorxiv.org/content/10.1101/309344v1.full.pdf
